# Supplementary material
Source: PubMed Central journal article supplement (PMC9859806)
Supplement: 42003_2023_4447_MOESM3_ESM.pdf [file 42003_2023_4447_MOESM3_ESM.pdf]

## Description of Additional Supplementary Files

**File name:** Supplementary Data 1

**Description:** Metadata for TCR repertoire samples obtained for all datasets used in study.

**File name:** Supplementary Data 2

**Description:** Number of clones and unique clonotypes for each sample across datasets.

**File name:** Supplementary Data 3

**Description:** CDR3 length statistics for each sample across datasets.

**File name:** Supplementary Data 4

**Description:** Diversity statistics including Chao1 estimators, Gini-Simpson indices, and inverse Simpson indices for each sample across datasets.

**File name:** Supplementary Data 5

**Description:** V and J gene usage statistics for each sample in Adaptive Biotechnologies datasets.

**File name:** Supplementary Data 6

**Description:** V and J gene usage statistics for each sample in ISB-Swedish datasets.

**File name:** Supplementary Data 7

**Description:** Principal components analysis results for 3-mer, 4-mer, 5-mer, and 6-mer representations of each sample in ISB-Swedish datasets.

**File name:** Supplementary Data 8

**Description:** GLIPH clustering analysis patterns, scores, and statistics for ISB-Swedish datasets by T cell type and disease condition.

**File name:** Supplementary Data 9

**Description:** OLGA analysis inputs of structured ISB-Swedish datasets by T cell type and disease condition.

**File name:** Supplementary Data 10

**Description:** OLGA analysis output pGen scores of ISB-Swedish datasets by T cell type and disease condition.

**File name:** Supplementary Data 11

**Description:** COVID-19-associated clusters in ISB-Swedish datasets by T cell type.

**File name:** Supplementary Data 12

**Description:** UMAP coordinates for CD4 and CD8 T cell single-cell transcriptome analyses.

**File name:** Supplementary Data 13

**Description:** Cell proportions and counts for clonally expanded groups from CD4 and CD8 T cell single cell transcriptome analyses.

**File name:** Supplementary Data 14

**Description:** Differential gene expression for Cluster 6 vs all other cells in CD4 T cell transcriptome analysis and Expanded group cells vs all other cells in CD8 T cell transcriptome analysis.

**File name:** Supplementary Data 15

**Description:** Upregulated and downregulated genes for CD4 and CD8 T cell clonal expansion differential gene expression analysis using threshold q-value < 1e-4.

**File name:** Supplementary Data 16

**Description:** DAVID gene ontology biological process annotations for CD4 and CD8 T cell clonal expansion differential gene expression analysis using threshold q-value < 1e-4.

**File name:** Supplementary Data 17

**Description:** Average AUROC scores for machine learning models trained to predict disease severity from healthy donors using different k-mer and GLIPH2 representations of TCR repertoires.
